# Supplementary material for: Crowding-induced opening of the mechanosensitive Piezo1 channel in silico
Source: PubMed Central journal article supplement (PMC7815867; doi:10.1038/s42003-020-01600-1), 2021-01-19
Supplement: 42003_2020_1600_MOESM2_ESM.pdf [file 42003_2020_1600_MOESM2_ESM.pdf]

# Crowding-induced Opening of the Mechanosensitive Piezo1 Channel in Silico

Wenjuan Jiang<sup>1</sup>, John Smith Del Rosario<sup>2§</sup>, Wesley Botello-Smith<sup>1§</sup>, Siyuan Zhao<sup>2</sup>, Yi-chun Lin<sup>1</sup>, Han Zhang<sup>1</sup>, Jérôme Lacroix<sup>3\*</sup>, Tibor Rohacs<sup>2\*</sup>, Yun Lyna Luo<sup>1\*</sup>

## SUPPLEMENTARY MATERIALS

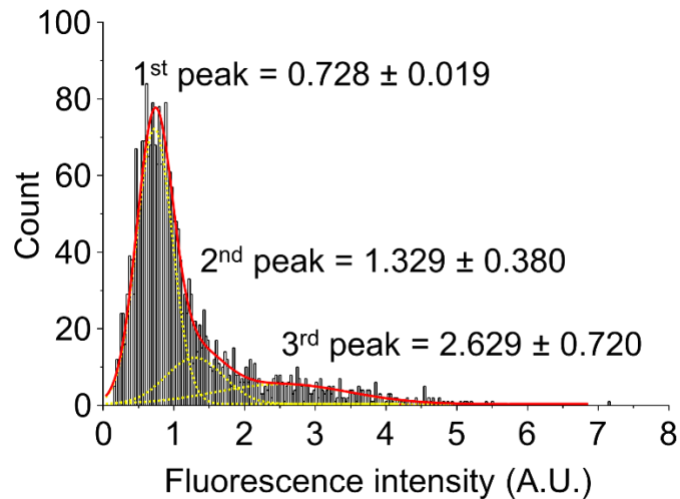

**Figure S1. Distribution of fluorescence intensity of GFP-mPiezo1 puncta observed by TIRF in HEK293 cells.** The plot shows the distribution of fluorescence intensity obtained from 2398 eGFP-Piezo1 randomly selected puncta from 28 cells. The TIRF illumination power and exposure time were identical for all cells. The profile is well fitted ( $R^2=0.9668$ ) with a 3-gaussian function with a major peak ( $0.728 \pm 0.019$ ) and two minors peaks ( $1.329 \pm 0.380$  and  $2.629 \pm 0.720$ ).

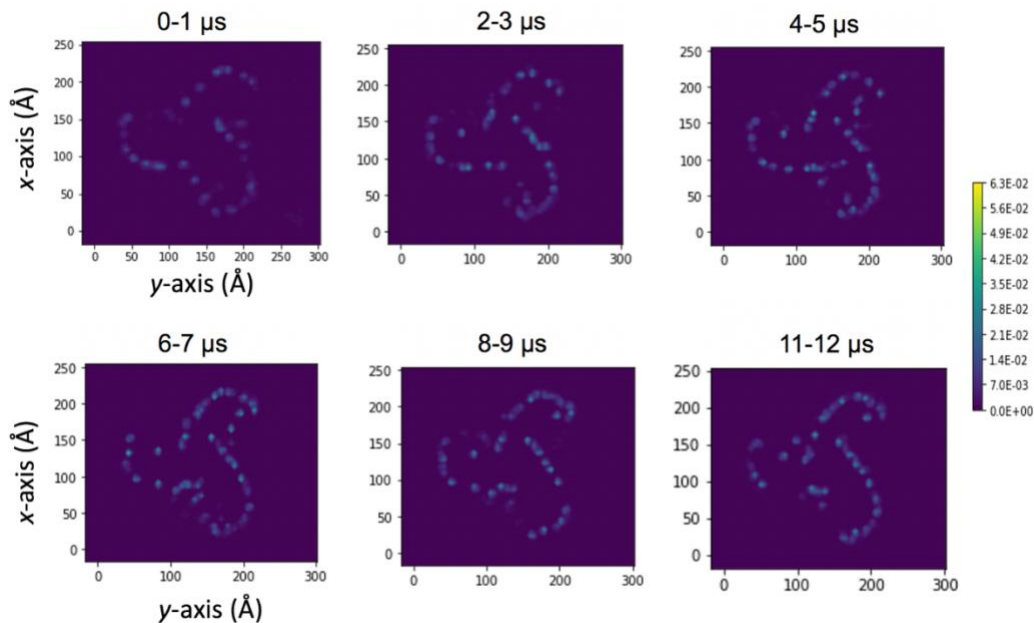

**Figure S2:** 2D lateral density maps of PIP<sub>2</sub> at lower leaflet over CG simulation trajectory.

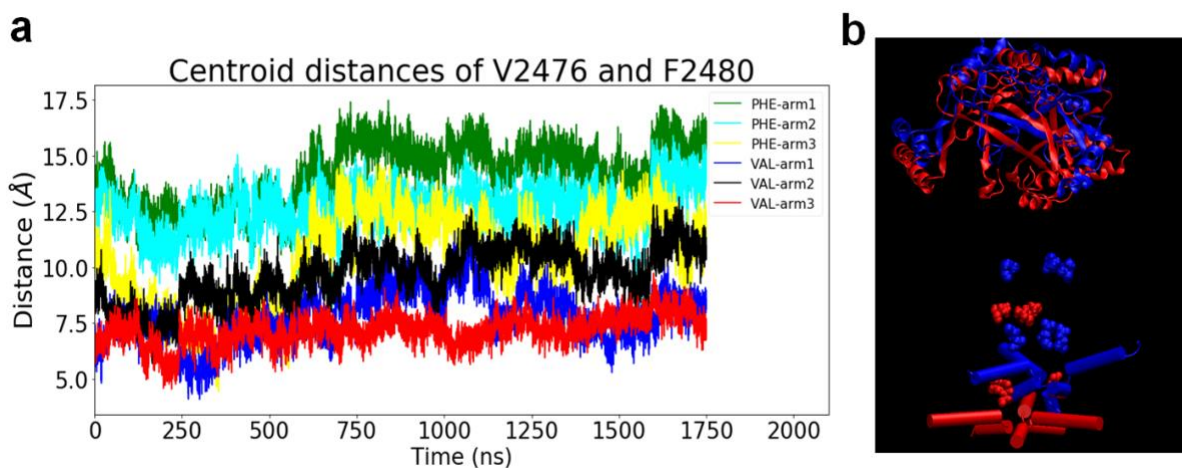

**Figure S3:** **a.** Centroid distances of three F2480 and three V2476 during 1.75  $\mu$ s MD simulation (*box 1* system). The centroid distance of F2480 is calculated from the triangle formed by sidechain carbon atom type CZ of F2480 residues from three subunits. **b.** The cap and CTD positions before (red) and after 2  $\mu$ s simulation (blue), indicating the CTD moved upward upon Piezo1 arm flattening (*box 1* system). Residue V2476 and E2495 are shown in VDW.

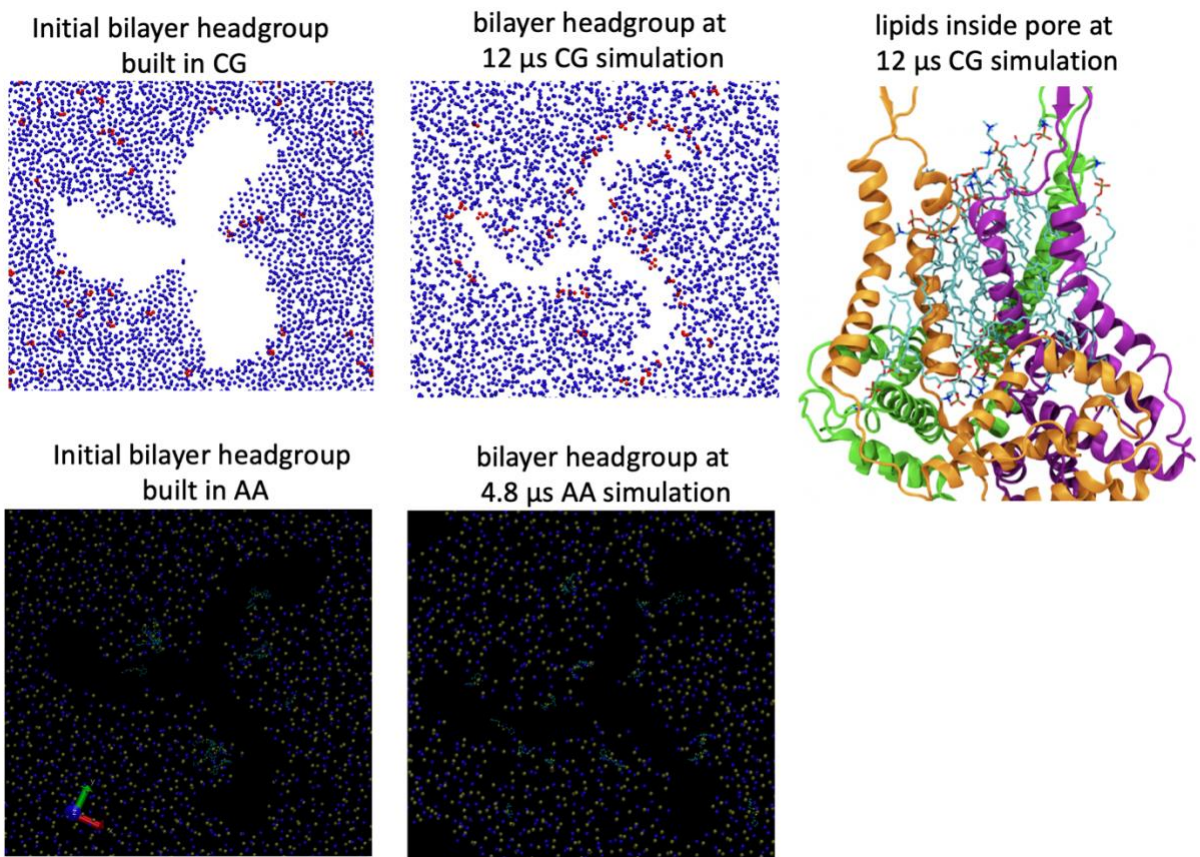

**Figure S4:** Lipid headgroups at the beginning and end of the CG and AA simulations. The AA data are taken from Ref 21. In CG, blue dots are POPC headgroups, and red dots are PIP2 headgroups. In AA, blue dots are nitrogen atoms, yellow dots are phosphorus atoms in POPC headgroups, Yoda1 molecules are shown in cyan licorice. On the right, lipids are shown in licorice with atom color code (red oxygen, blue nitrogen, cyan carbon, tan phosphorus). The backbone of Piezo1 pore is shown in newcartoon mode with different colors for each subunit (orange, green, and purple).

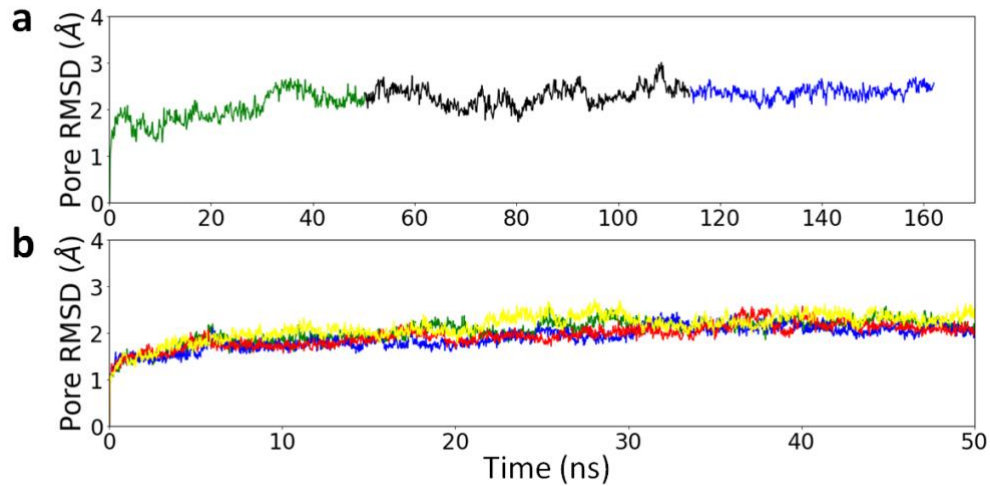

**Figure S5:** **a)** Root-mean-square deviation (RMSD) of inner pore helices backbone of Piezo1 under different membrane tensions without voltage. Lateral pressure of 10, 8, 6, 4, 2 bars correspond to 14.2, 11.4, 8.5, 5.7, 2.8 mN/m. The green line stands for 50ns with 10bar, the black line stands for 64 ns with lateral pressure from 8 bar to 2 bar, each tension runs for 16 ns, and the blue line stands for 48ns with 0 bar **b)** RMSD of inner pore helices backbone under different voltages: -500mV in green, -250mV in blue, 250mV in red and 500mV in yellow lines.

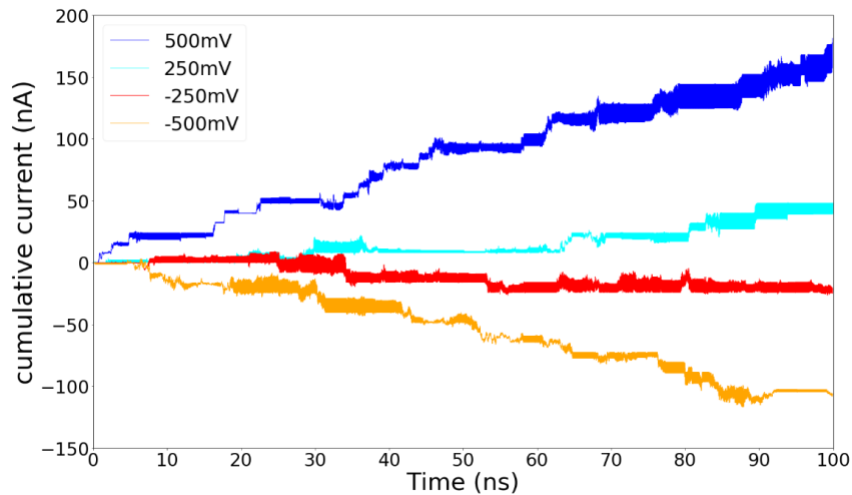

**Figure S6:** Cumulative currents through the inner pore helices of Piezo1 under different voltages over two replicas (in total 100ns). The current is calculated from Approach 2, referring as “z-displacement method”.

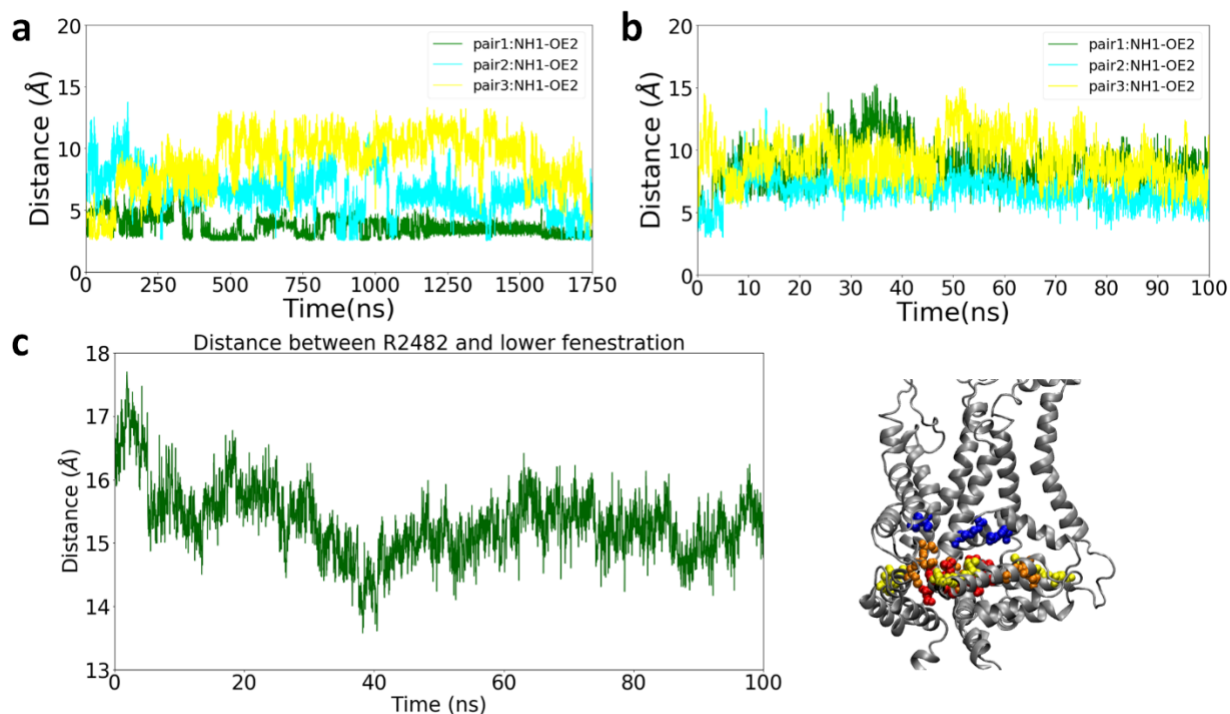

**Figure S7.** Saltbridge distance between sidechain oxygen of E2133 and sidechain nitrogen of R2482 for WT Piezo1 over 1.75 $\mu$ s in *box1* system (a) and E2133Q mutant mimic over 100ns (b). c) Distance between R2482 sidechain and the center of the lower fenestration averaged over three subunits. The center of each lower fenestration is defined by the total center of mass of nine residues in the fenestration C2154, S2150, N2151, S2491, E2495/6, I2164, S2168, E2171. Figure on the right illustration the position of R2482 above the lower fenestration. Color scheme: R2482 in blue; C2154, S2150, N2151 in orange; S2491, E2495/6 in red; I2164, S2168, E2171 in yellow. Pore helix and CTD regions are shown in grey in newcartoon.

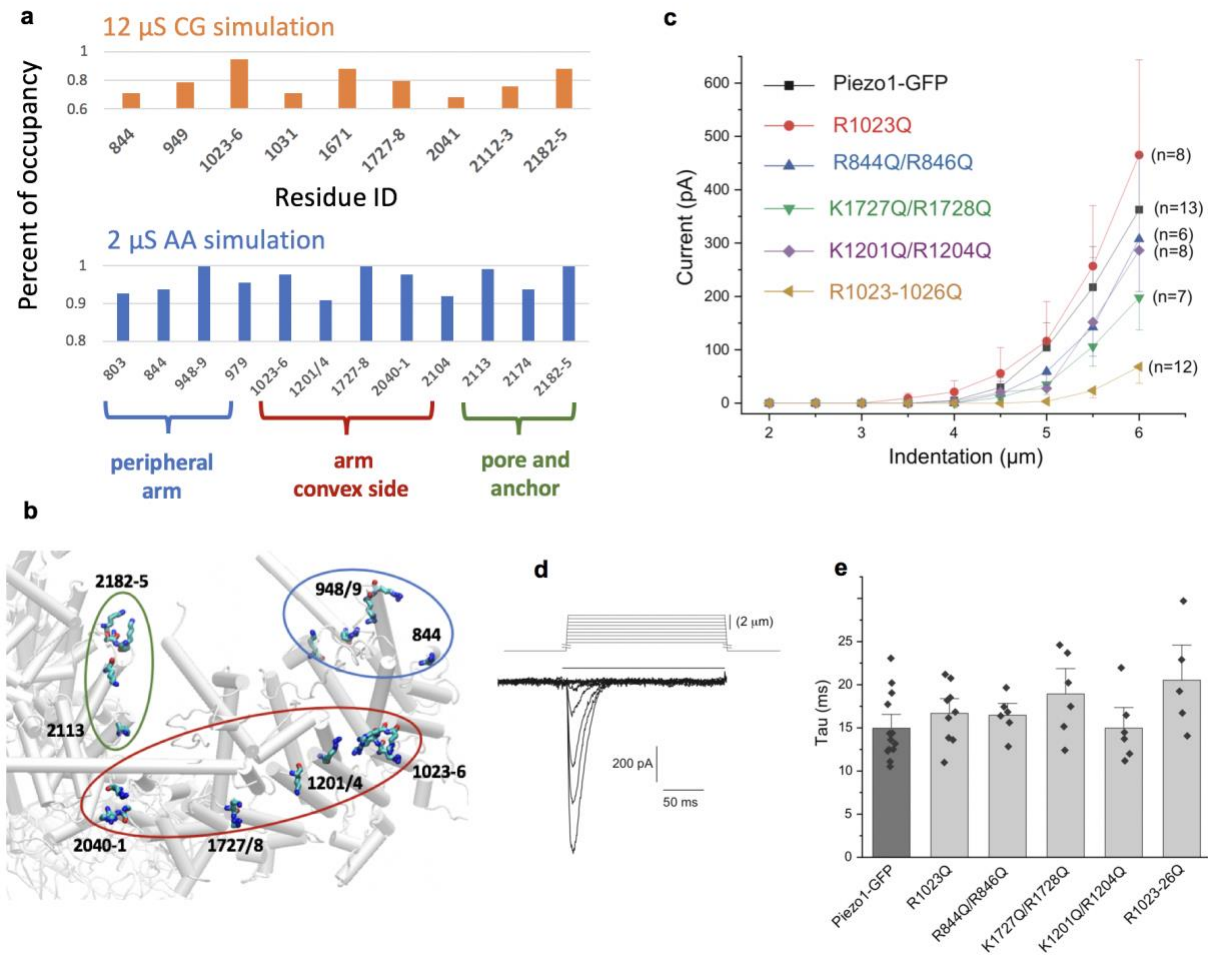

**Figure S8. The effect of mutating PIP<sub>2</sub> interacting residue clusters on Piezo1 channel activity.** (a) The residues in mouse Piezo1 that have maximum PIP<sub>2</sub> occupancy above 60% of 12  $\mu$ S CG simulation or above 90% of 2  $\mu$ S AA *box1* simulation. (b) Hotspot residues clustered by locations on the Piezo1 structure (bottom view). (c) Summary of current amplitudes in response to increasing mechanical stimuli for wild type and mutant Piezo1 channels. Whole cell patch clamp experiments on HEK293 cells transfected with the GFP-tagged mouse Piezo1 and its mutants were performed as described in the methods section. Data are shown as mean  $\pm$  SEM, the number of cells tested are indicated for each mutant. (d) Representative trace of wild type Piezo1 currents in response to increasing mechanical indentations. (e) Summary of the inactivation time constant for wild type and mutant Piezo1 currents. Data are shown as mean  $\pm$  SEM, and scatter plots.

**Table S1.** Details of CG and AA Piezo1 simulation systems.

| System |                              | Inner |      | Outer | no. of |                 |                 |
|--------|------------------------------|-------|------|-------|--------|-----------------|-----------------|
|        |                              | PC    | PIP2 | PC    | Water  | Na <sup>+</sup> | Cl <sup>+</sup> |
| CG     | POPC : POPC/PIP <sub>2</sub> | 831   | 41   | 951   | 109414 | 1252            | 1157            |
| AA     | POPC : POPC/PIP <sub>2</sub> | 587   | 39   | 664   | 185688 | 799             | 712             |

**Table S2.** Details of extended all-atom Piezo1 simulation systems.

| System      | Inner |                  | Outer | Number of |                |                 | x-dim (nm) | y-dim (nm) | xy area (nm <sup>2</sup> ) | %Protein Occupancy* |       | Time (μs) |
|-------------|-------|------------------|-------|-----------|----------------|-----------------|------------|------------|----------------------------|---------------------|-------|-----------|
|             | POPC  | PIP <sub>2</sub> | POPC  | Water     | K <sup>+</sup> | Cl <sup>-</sup> |            |            |                            | Inner               | Outer |           |
| <b>Box1</b> | 537   | 38               | 607   | 160133    | 695            | 612             | 19.3       | 25.1       | 484.4                      | 19.0                | 14.4  | 2.00      |
| <b>Box2</b> | 534   | 38               | 610   | 161136    | 721            | 638             | 19.9       | 24.4       | 485.5                      | 19.6                | 14.2  | 1.75      |
| <b>Box3</b> | 519   | 37               | 590   | 151351    | 753            | 674             | 21.3       | 22.5       | 479.2                      | 20.8                | 15.9  | 1.75      |

\* Protein occupied area is estimated by subtracting the lipid surface area from the total PBC box xy area for upper and lower leaflet individually. The area per lipid reported in Charmm36 force field is 68.3Å<sup>2</sup> per POPC and 67.4Å<sup>2</sup> per PIP<sub>2</sub>:

$$Occupancy_{UpperLeaflet} = \frac{BoxArea_{XY} - N_{POPC} * Area_{POPC}}{BoxArea_{XY}}$$

$$Occupancy_{LowerLeaflet} = \frac{BoxArea_{XY} - N_{POPC} * Area_{POPC} - N_{PIP2} * Area_{PIP2}}{BoxArea_{XY}}$$

**Table S3.** Piezo dome-dome distance (R) in nm along x and y axis (see Figure 2b). The average dome radius (r) is 9.2 nm.

|           | <b>Box1</b> | <b>Box2</b> | <b>Box3</b> |
|-----------|-------------|-------------|-------------|
| x-dim     | 19.3        | 19.9        | 21.3        |
| R along x | 0.9         | 1.5         | 2.9         |
| y-dim     | 25.1        | 24.4        | 22.5        |
| R along y | 6.7         | 6.0         | 4.1         |

**Table S4.** Number of permeation events for WT and mutant Piezo1 channels using two approaches\*.

| System  | Voltage (mV) | Time (ns) | K <sup>+</sup> / 100ns |            | Cl <sup>-</sup> /100ns |            | Conductance (pS)    |            | K <sup>+</sup> / Cl <sup>-</sup> ratio |            |
|---------|--------------|-----------|------------------------|------------|------------------------|------------|---------------------|------------|----------------------------------------|------------|
|         |              |           | Approach 1             | Approach 2 | Approach 1             | Approach 2 | Approach 1          | Approach 2 | Approach 1                             | Approach 2 |
| WT      | 500          | 100       | 11<br>(6.9-16.5)       | 13±2.2     | 7<br>(3.8-11.5)        | 10±2.3     | 39.7<br>(22.4-66.8) | 52.0±32.2  | 2.9                                    | 2.5        |
| WT      | 250          | 100       | 3<br>(1.1-6.2)         | 4±1.8      | 2<br>(0.6-4.8)         | 2±1.9      |                     |            |                                        |            |
| WT      | -250         | 100       | 3<br>(1.1-6.2)         | 3±1.9      | 0<br>(0-1.0)           | 0±2.4      |                     |            |                                        |            |
| WT      | -500         | 100       | 9<br>(5.3-14.0)        | 12±1.7     | 0<br>(0-1.0)           | 1±1.5      |                     |            |                                        |            |
| E2133Q  | 500          | 100       | 1<br>(0.5-3.2)         | 6±2.8      | 7<br>(3.8-11.5)        | 14±2.4     | N/A                 |            | 0.1                                    | 0.4        |
| 9K-muta | 500          | 100       | 1<br>(0.5-3.2)         | 10±1.1     | 9<br>(5.3-14.0)        | 19±2.1     |                     |            | 0.1                                    | 0.5        |

\*Approach 1 is the boundary-crossing approach (see Methods). The uncertainty in parentheses is 85% confidence interval based on a Poisson distribution. Approach 2 is the z-displacement approach. The standard deviation is estimated from bootstrapping.



**Table S5. GROMACS topology file (bead type) for Martini PI(4,5)P<sub>2</sub> model\*.**

| nr | type | resnr | residue | atom | cgnr | charge |
|----|------|-------|---------|------|------|--------|
| 1  | P1   | 1     | POP5    | C1   | 1    | 0      |
| 2  | Na   | 1     | POP5    | C2   | 2    | 0      |
| 3  | P4   | 1     | POP5    | C3   | 3    | 0      |
| 4  | Qa   | 1     | POP5    | PO4  | 4    | -1.0   |
| 5  | Qa   | 1     | POP5    | P1   | 5    | -2.0   |
| 6  | Qa   | 1     | POP5    | P2   | 6    | -1.0   |
| 7  | Na   | 1     | POP5    | GL1  | 7    | 0      |
| 8  | Na   | 1     | POP5    | GL2  | 8    | 0      |
| 9  | C1   | 1     | POP5    | C1A  | 9    | 0      |
| 10 | C4   | 1     | POP5    | D2A  | 10   | 0      |
| 11 | C4   | 1     | POP5    | D3A  | 11   | 0      |
| 12 | C1   | 1     | POP5    | C4A  | 12   | 0      |
| 13 | C1   | 1     | POP5    | C1B  | 13   | 0      |
| 14 | C1   | 1     | POP5    | C2B  | 14   | 0      |
| 15 | C1   | 1     | POP5    | C3B  | 15   | 0      |
| 16 | C1   | 1     | POP5    | C4B  | 16   | 0      |

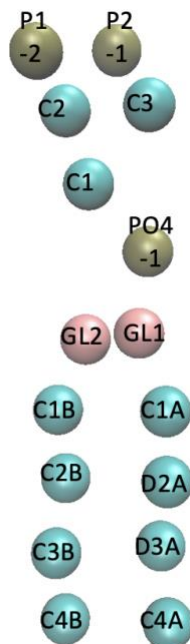

\*The parameter file itp and pdb, as well as a modified INSANE script are provided at [https://github.com/reneejiang/cg\\_pip2\\_topology\\_files](https://github.com/reneejiang/cg_pip2_topology_files)



**Table S7. Bond length comparison between CG and AA model for PI(4,5)P<sub>2</sub>**

| Bond Pairs | Atom Model(nm) | CG model (nm) | Difference (nm) | %Diff  |
|------------|----------------|---------------|-----------------|--------|
| C1_C2      | 0.27           | 0.40          | 0.13            | 46.82  |
| C1_C3      | 0.32           | 0.40          | 0.08            | 24.84  |
| C2_C3      | 0.27           | 0.40          | 0.13            | 46.02  |
| C2_P1      | 0.33           | 0.30          | -0.03           | -9.41  |
| C2_P2      | 0.33           | 0.35          | 0.02            | 5.69   |
| C1_P1      | 0.44           | 0.40          | -0.04           | -8.64  |
| C3_P2      | 0.43           | 0.31          | -0.12           | -28.11 |
| P1_P2      | 0.61           | 0.60          | -0.01           | -1.03  |
| C1_PO4     | 0.34           | 0.31          | -0.02           | -6.08  |
| PO4_GL1    | 0.43           | 0.45          | 0.02            | 3.34   |
| GL1_GL2    | 0.27           | 0.35          | 0.08            | 29.61  |
| GL1_C1A    | 0.51           | 0.46          | -0.05           | -9.90  |
| C1A_D2A    | 0.44           | 0.45          | 0.01            | 2.14   |
| D2A_D3A    | 0.52           | 0.45          | -0.07           | -13.34 |
| D3A_C4A    | 0.52           | 0.45          | -0.06           | -12.11 |
| GL2_C1B    | 0.63           | 0.45          | -0.18           | -28.22 |
| C1B_C2B    | 0.52           | 0.45          | -0.07           | -14.09 |
| C2B_C3B    | 0.47           | 0.45          | -0.03           | -5.30  |
| C3B_C4B    | 0.47           | 0.45          | -0.02           | -4.01  |

**Table S8. Angle comparison between CG and AA model for PI(4,5)P<sub>2</sub>**

| Angle Pairs | Atom Model (degrees) | CG model (degrees) | Difference (degrees) | %Diff  |
|-------------|----------------------|--------------------|----------------------|--------|
| C1_PO4_GL1  | 101.35               | 132.26             | 30.92                | 30.51  |
| GL1_C1A_D2A | 107.09               | 141.37             | 34.28                | 32.01  |
| C1A_D2A_D3A | 109.43               | 92.07              | -17.37               | -15.87 |
| D2A_D3A_C4A | 105.27               | 118.42             | 13.15                | 12.49  |
| GL2_C1B_C2B | 110.94               | 138.13             | 27.19                | 24.51  |
| C1B_C2B_C3B | 138.20               | 136.60             | -1.61                | -1.16  |
| C2B_C3B_C4B | 134.62               | 137.64             | 3.02                 | 2.24   |

**Table S9. Radius of gyration comparison between CG and AA model for PI(4,5)P<sub>2</sub>**

| PI(4,5)P <sub>2</sub>  | Atom model | CG model | Difference | %Diff |
|------------------------|------------|----------|------------|-------|
| Radius of Gyration(nm) | 0.77       | 0.81     | 0.04       | 5.28  |
